# Supplementary material for: Amine Switchable Hydrophilic Solvent Vortex-Assisted Homogeneous Liquid–Liquid Microextraction and GC-MS for the Enrichment and Determination of 2, 6-DIPA Additive in Biodegradable Film
Source: MDPI journal article supplement (doi:10.3390/molecules29092068), 2024-04-30

**Figure S1.** The internal calibration curve ( $y=ax+b$ ) of 2, 6-DIPA using weighted ( $1/X$ ) least-squares linear regression models (A); The corresponding each data of internal calibration curve (B)

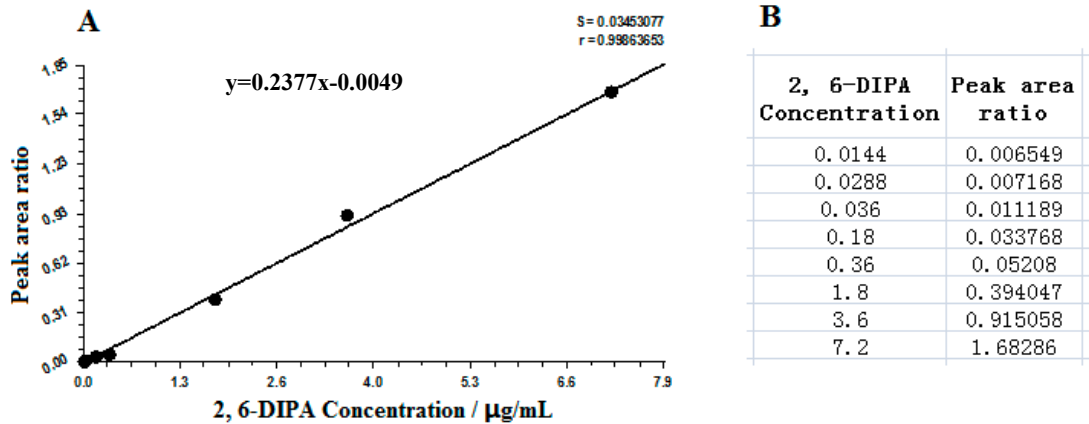

**Figure S2.** Typical raw GC-MS-SIM chromatogram of high (A: PBAT-1) and low (B: PBAT-2) concentration samples (12.37 min, DEA; 13.77, 2, 6-DIPA; 16.77, TBA)

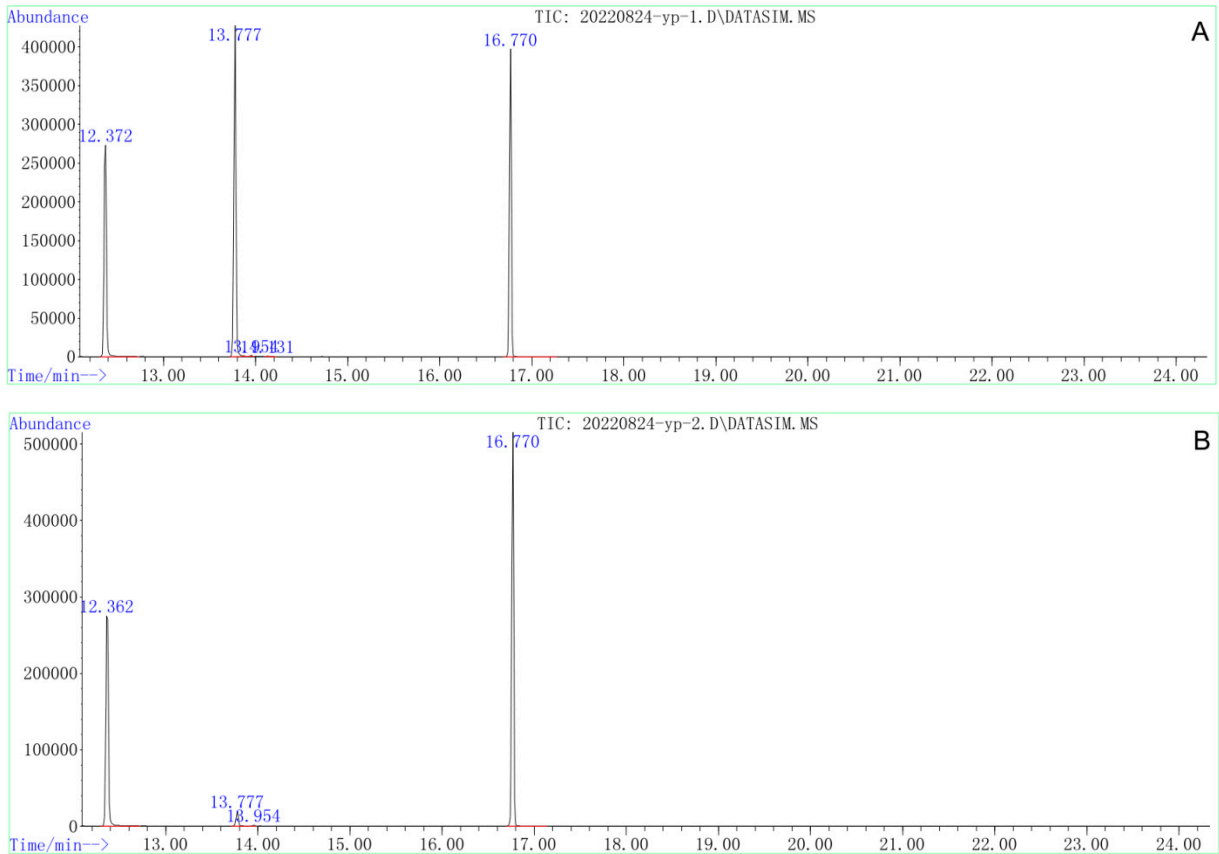

Supplement: s1 [file s1]
